# Supplementary material
Source: publisher figshare collection journal article supplement (https://sage.figshare.com/ndownloader/files/14676608)
Supplement: Supplementary file 1 [file 14676608]

| **Analysis of Reading Miscues** | | | | | | |
| --- | --- | --- | --- | --- | --- | --- |
|  |  |  | **Error Categories** | | |  |
|  | **Actual Word** | **Student Response** | **Graphophonetic** | **Syntactic** | **Semantic** | **Notes** |
| 1 |  |  |  |  |  |  |
| 2 |  |  |  |  |  |  |
| 3 |  |  |  |  |  |  |
| 4 |  |  |  |  |  |  |
| 5 |  |  |  |  |  |  |
| 6 |  |  |  |  |  |  |
| 7 |  |  |  |  |  |  |
| 8 |  |  |  |  |  |  |
| 9 |  |  |  |  |  |  |
| 10 |  |  |  |  |  |  |
| 11 |  |  |  |  |  |  |
| 12 |  |  |  |  |  |  |
| 13 |  |  |  |  |  |  |
| 14 |  |  |  |  |  |  |
| 15 |  |  |  |  |  |  |
| 16 |  |  |  |  |  |  |
| 17 |  |  |  |  |  |  |
| 18 |  |  |  |  |  |  |
| 19 |  |  |  |  |  |  |
| 20 |  |  |  |  |  |  |
| **Percentage** | | | ___/total errors = ___% | ___/total errors=___% | ___/total errors=___% |  |
